# Supplementary material for: Murine and related chapparvoviruses are nephro-tropic and produce novel accessory proteins in infected kidneys
Source: PubMed Central journal article supplement (PMC6999912; doi:10.1371/journal.ppat.1008262), 2020-01-23

# (A) 5' and 3' RACE overview

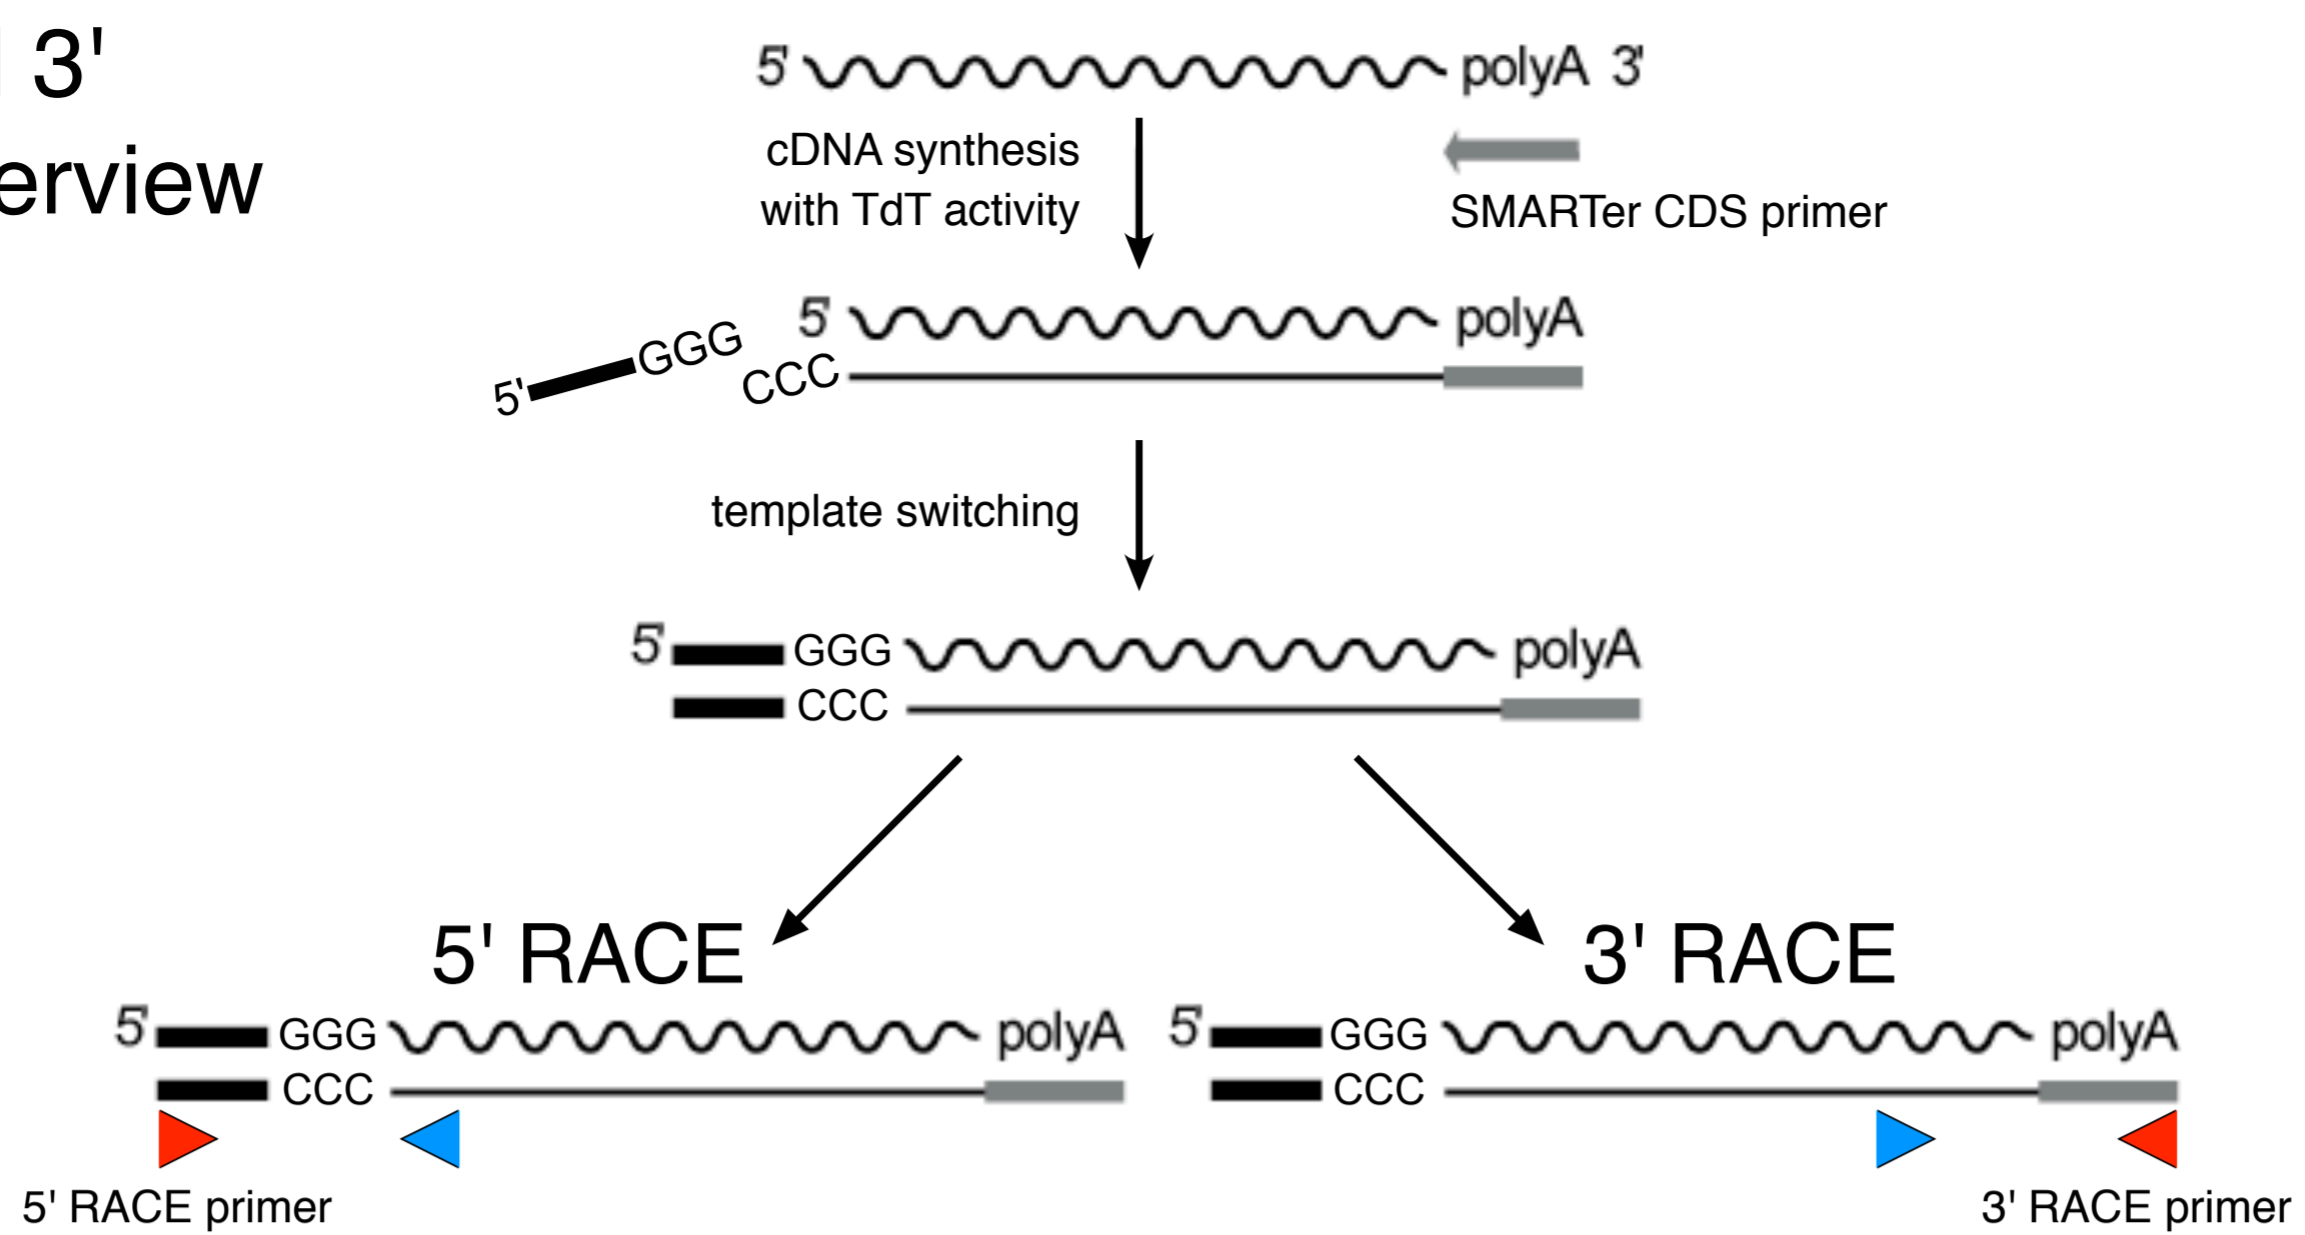

# (B) 5' RACE

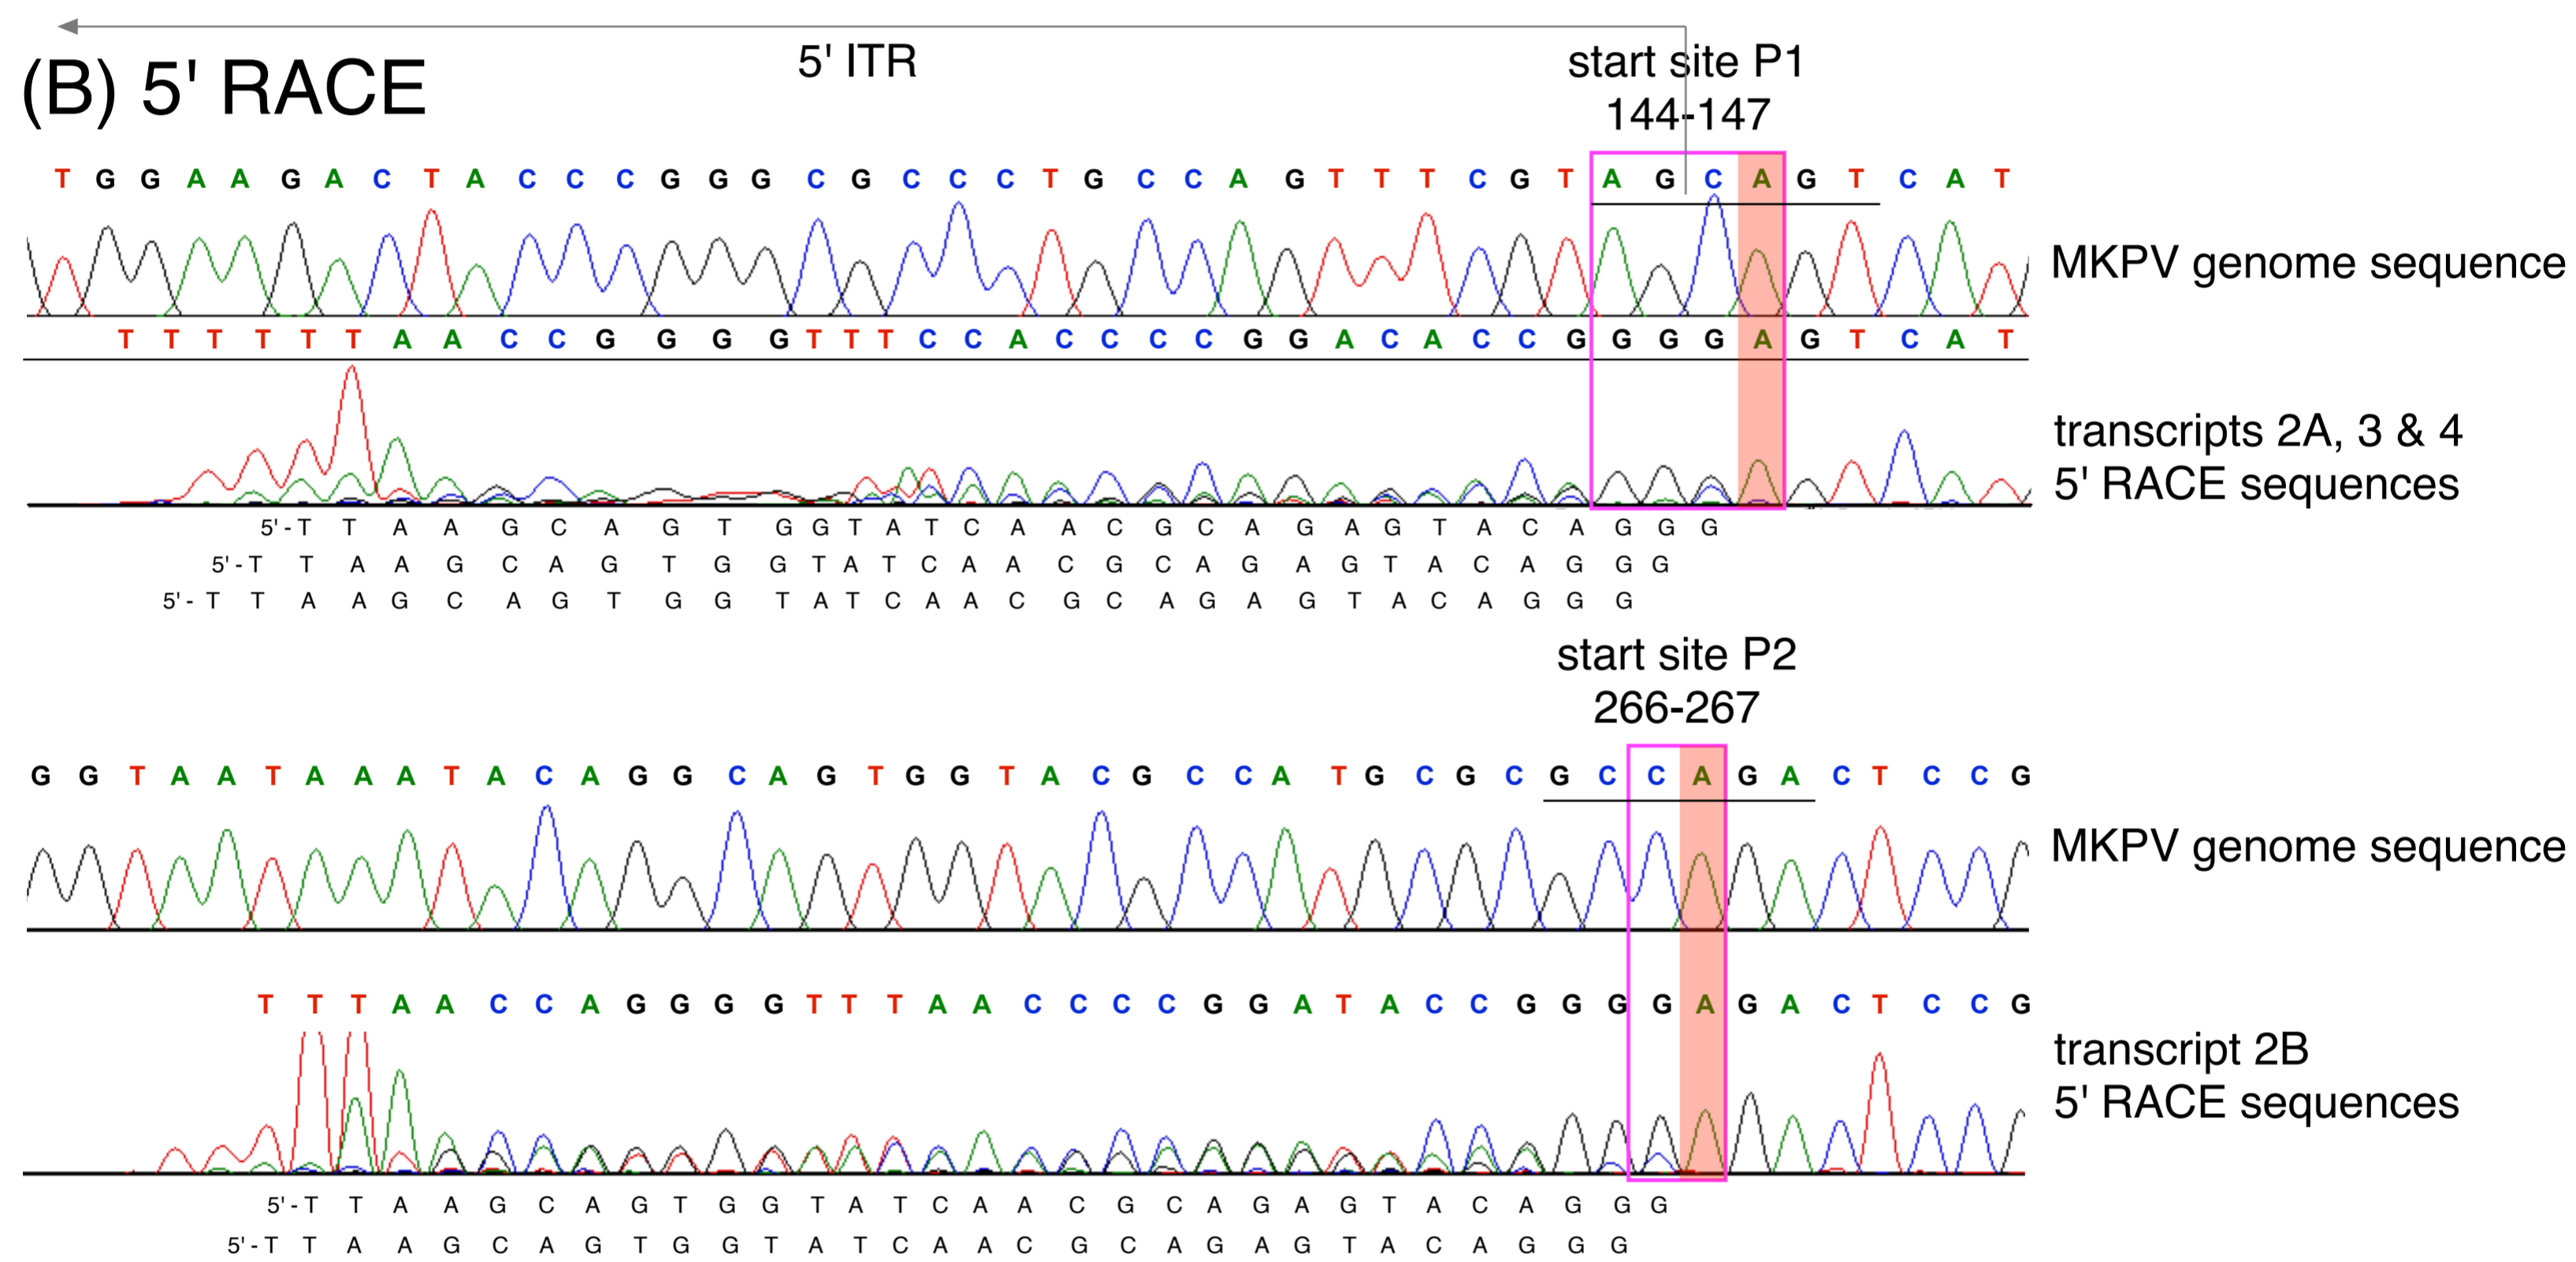

# (C) 3' RACE

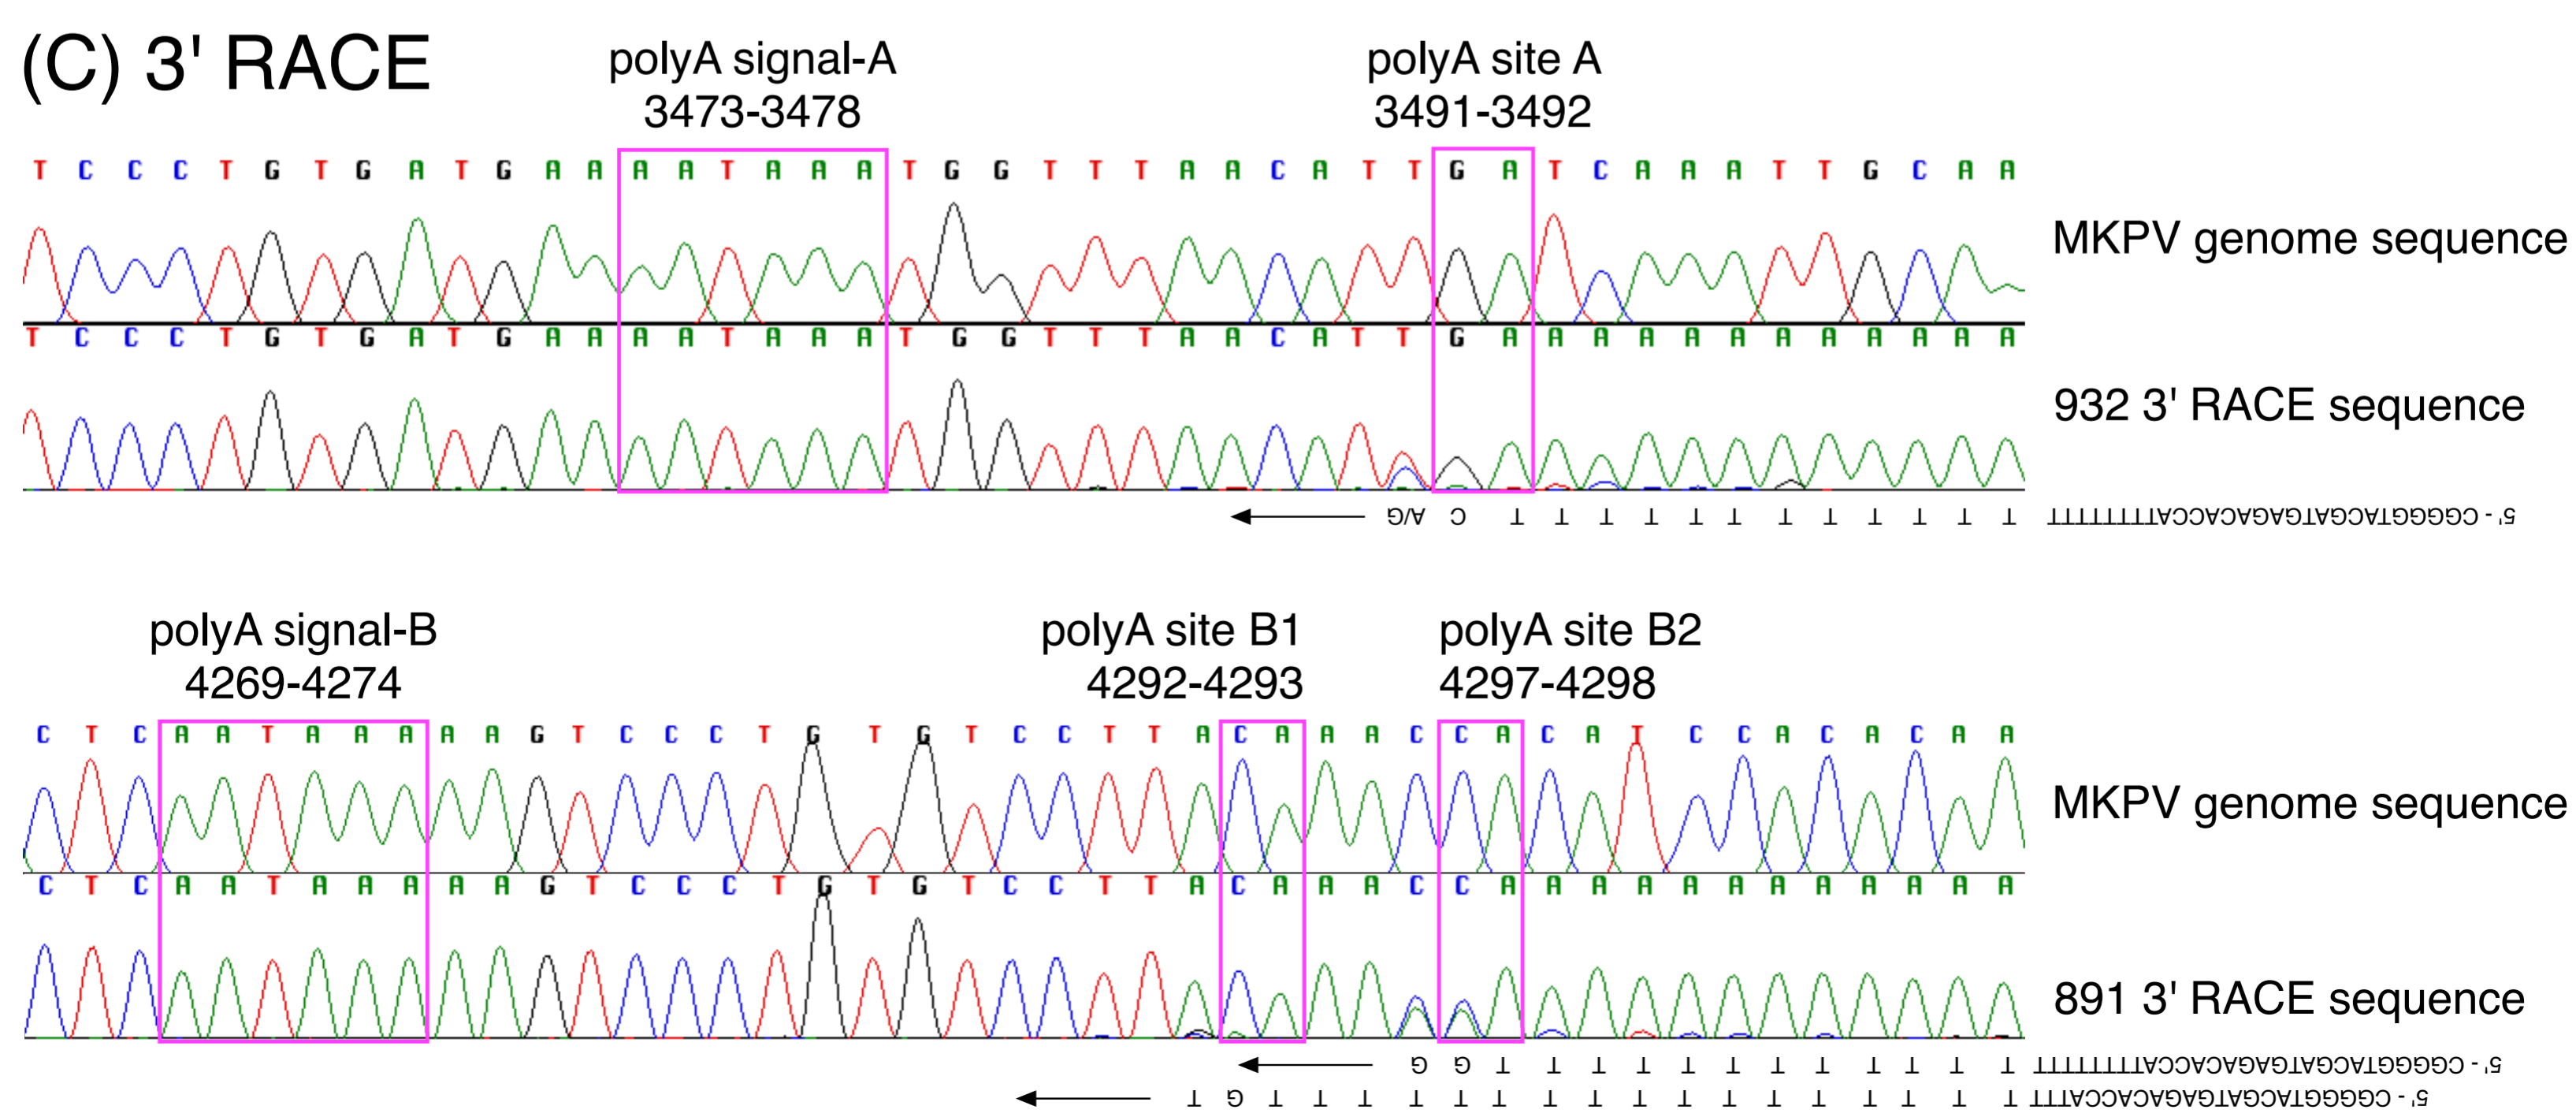

Supplement: ppat.1008262.s001.pdf [file ppat.1008262.s001.pdf]
