# Supplementary material for: Murine and related chapparvoviruses are nephro-tropic and produce novel accessory proteins in infected kidneys
Source: PubMed Central journal article supplement (PMC6999912; doi:10.1371/journal.ppat.1008262), 2020-01-23

threshold cycle

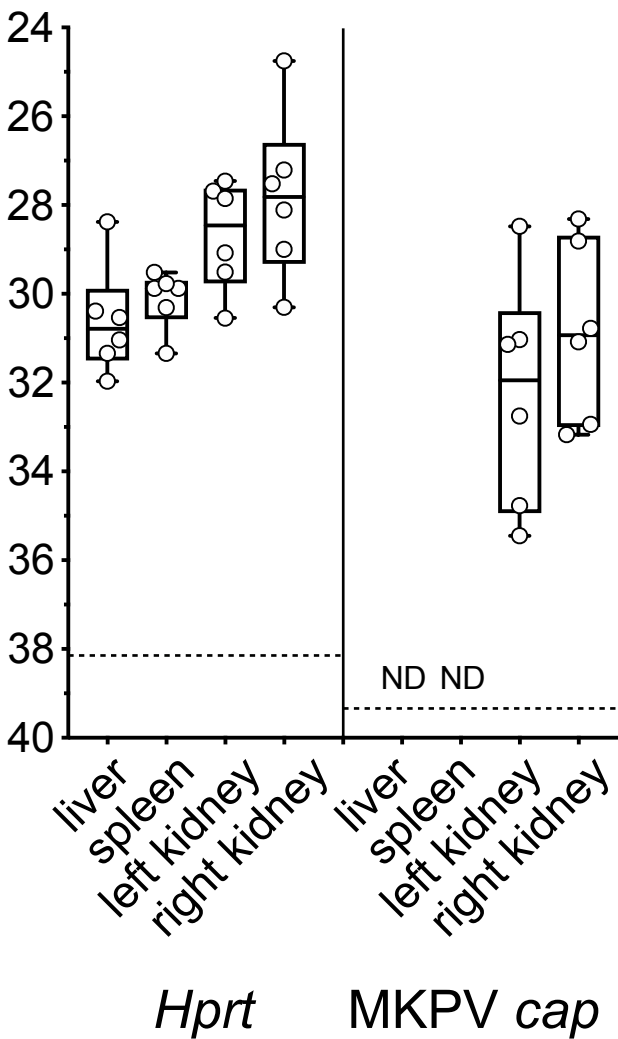

Supplement: ppat.1008262.s003.pdf [file ppat.1008262.s003.pdf]
