# Supplementary material for: Murine and related chapparvoviruses are nephro-tropic and produce novel accessory proteins in infected kidneys
Source: PubMed Central journal article supplement (PMC6999912; doi:10.1371/journal.ppat.1008262), 2020-01-23
Supplement: ppat.1008262.s004.pdf [file ppat.1008262.s004.pdf]

# 2D matrix comparison

Window Size = 6    Strand = Both    Scoring Matrix: DNA database matrix.nmat  
Min. % Score = 60    Jump = 1  
Hash Value = 8

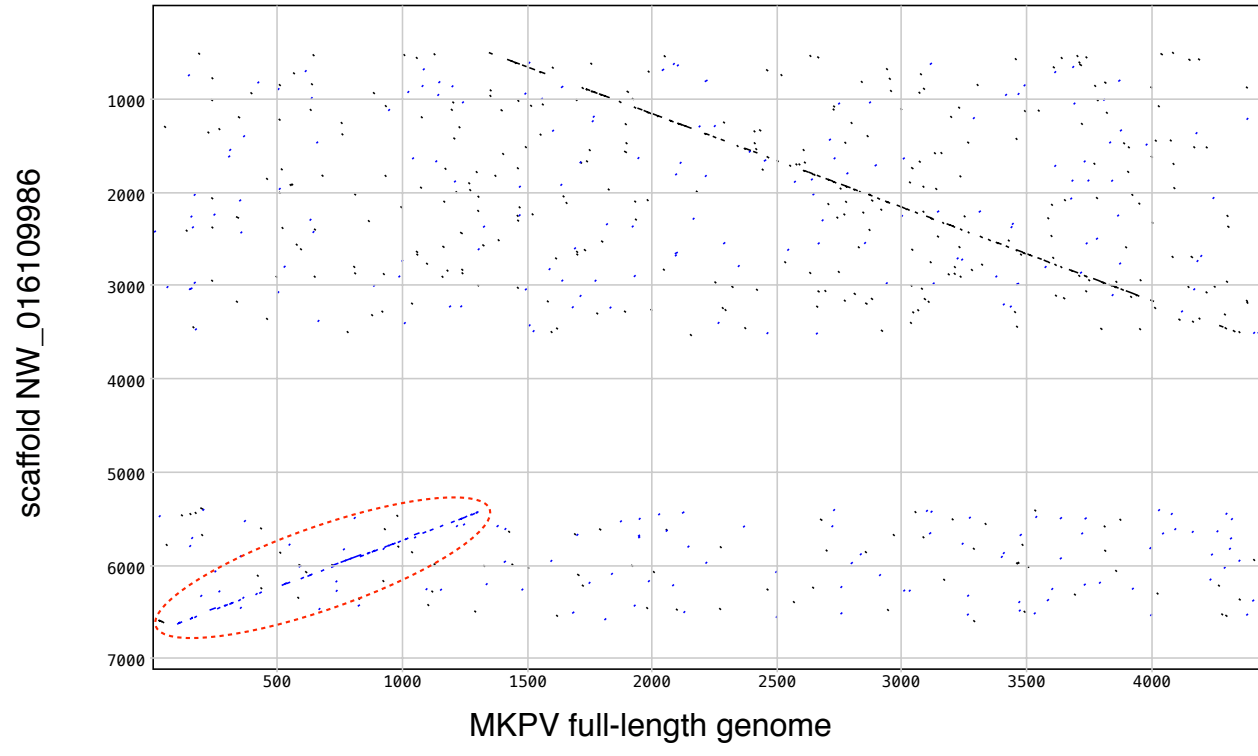

reverse-complement inversion; trim "N"s

Window Size = 6    Strand = Both    Scoring Matrix: DNA database matrix.nmat  
Min. % Score = 60    Jump = 1  
Hash Value = 8

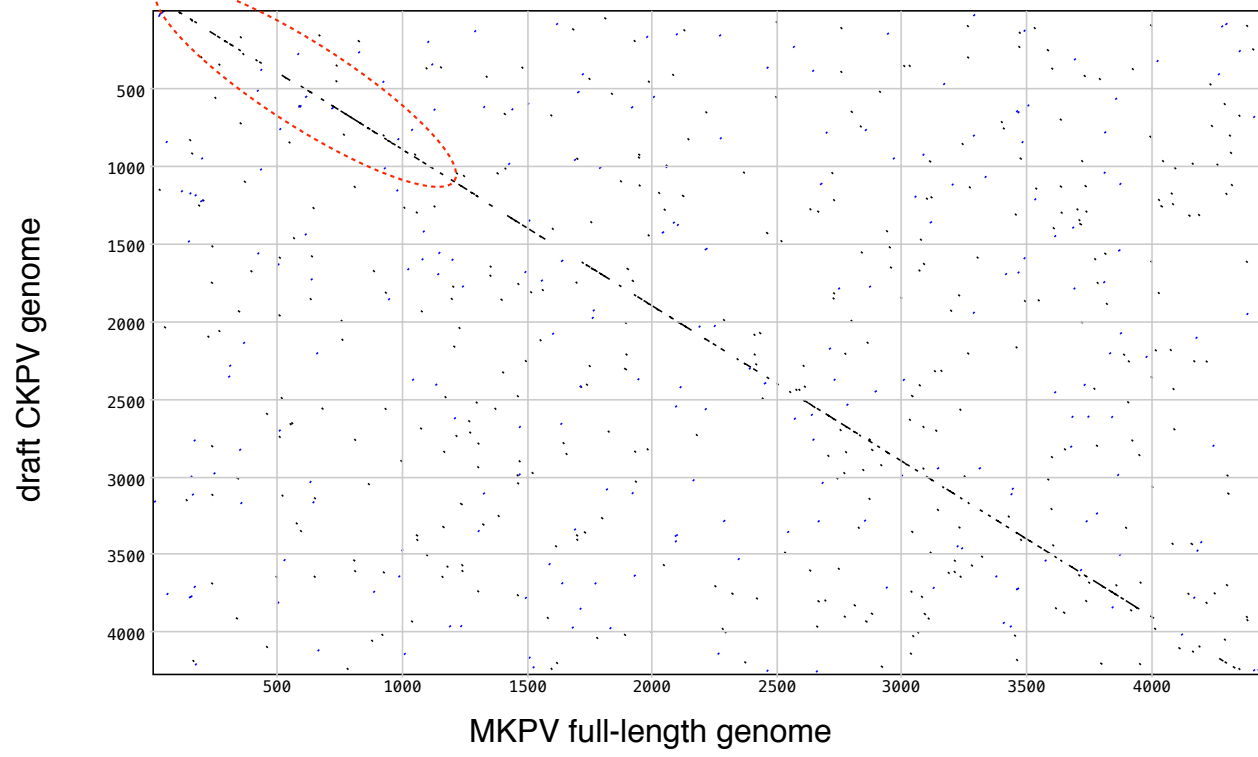

align reads to draft CKPV

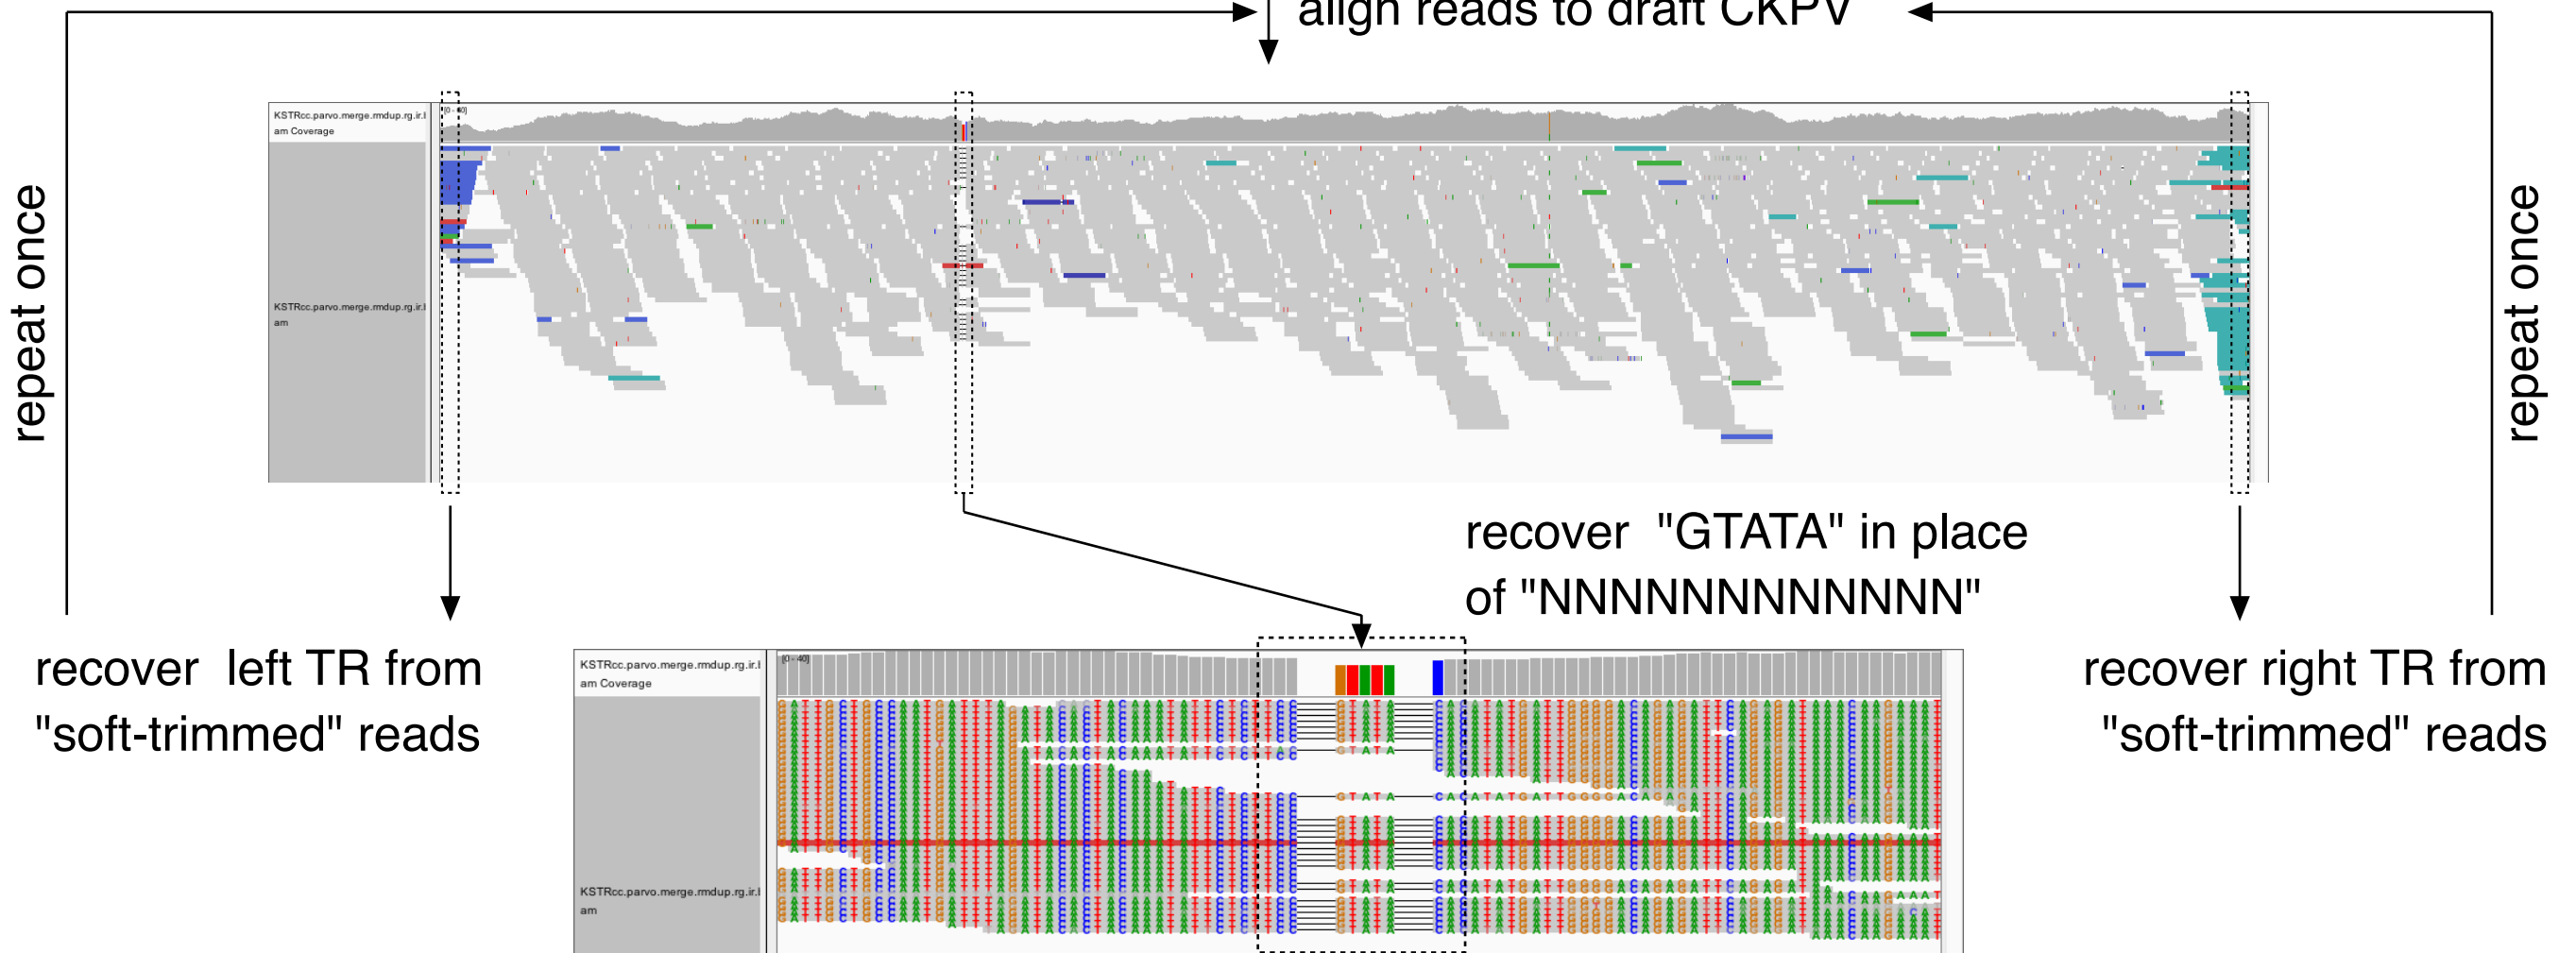

complete CKPV genome
