# Supplementary material for: Murine and related chapparvoviruses are nephro-tropic and produce novel accessory proteins in infected kidneys
Source: PubMed Central journal article supplement (PMC6999912; doi:10.1371/journal.ppat.1008262), 2020-01-23
Supplement: ppat.1008262.s005.pdf [file ppat.1008262.s005.pdf]

Figure S5A

VP

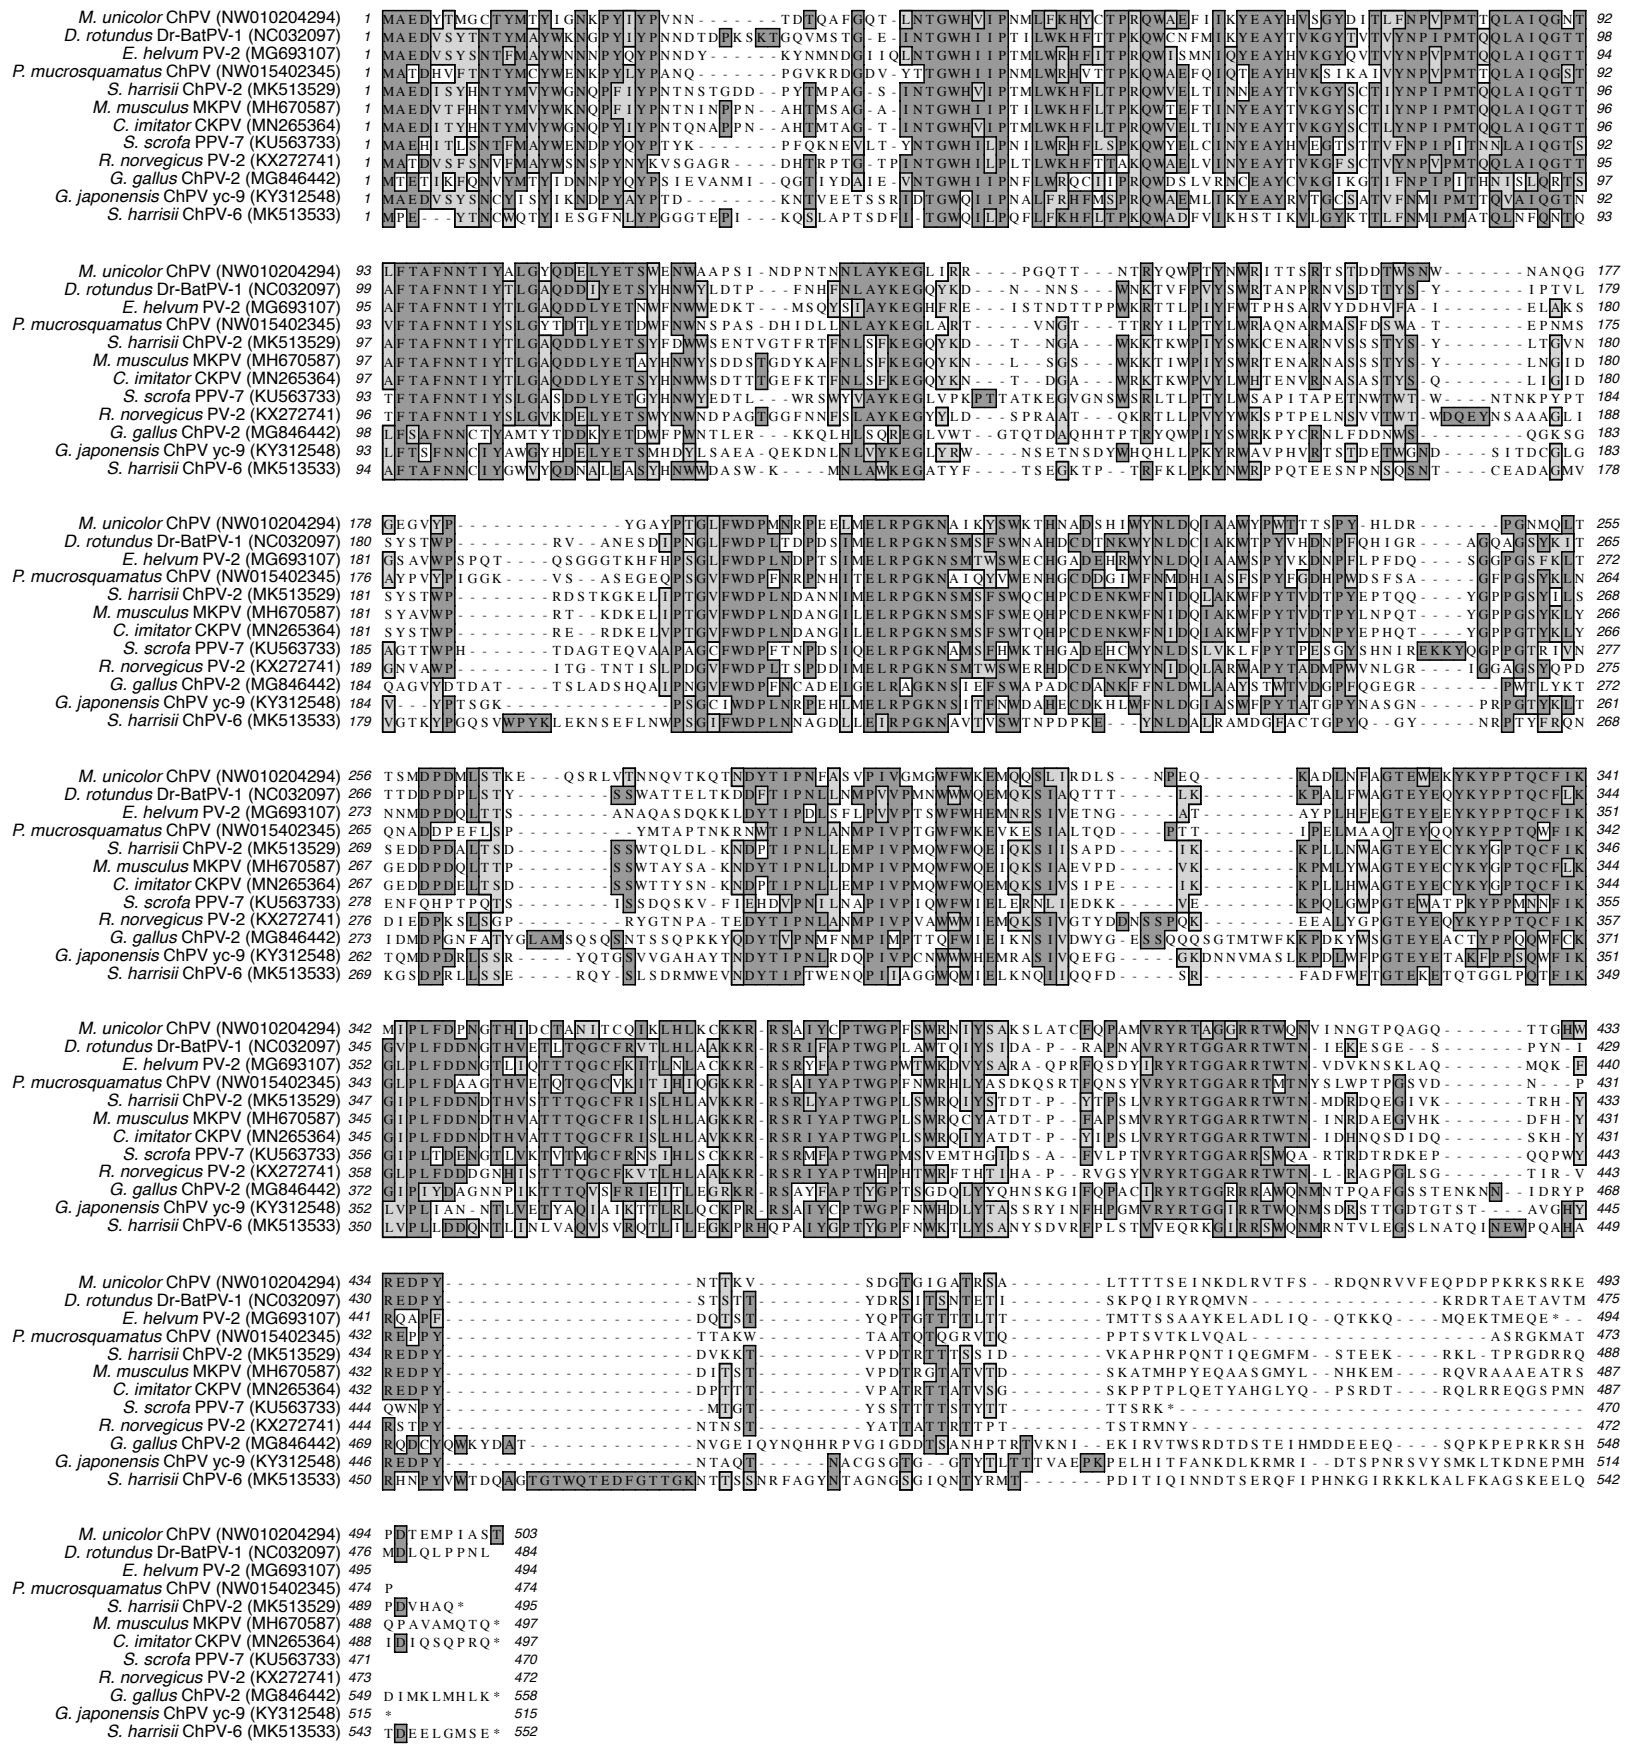

Figure S5A (cont.)

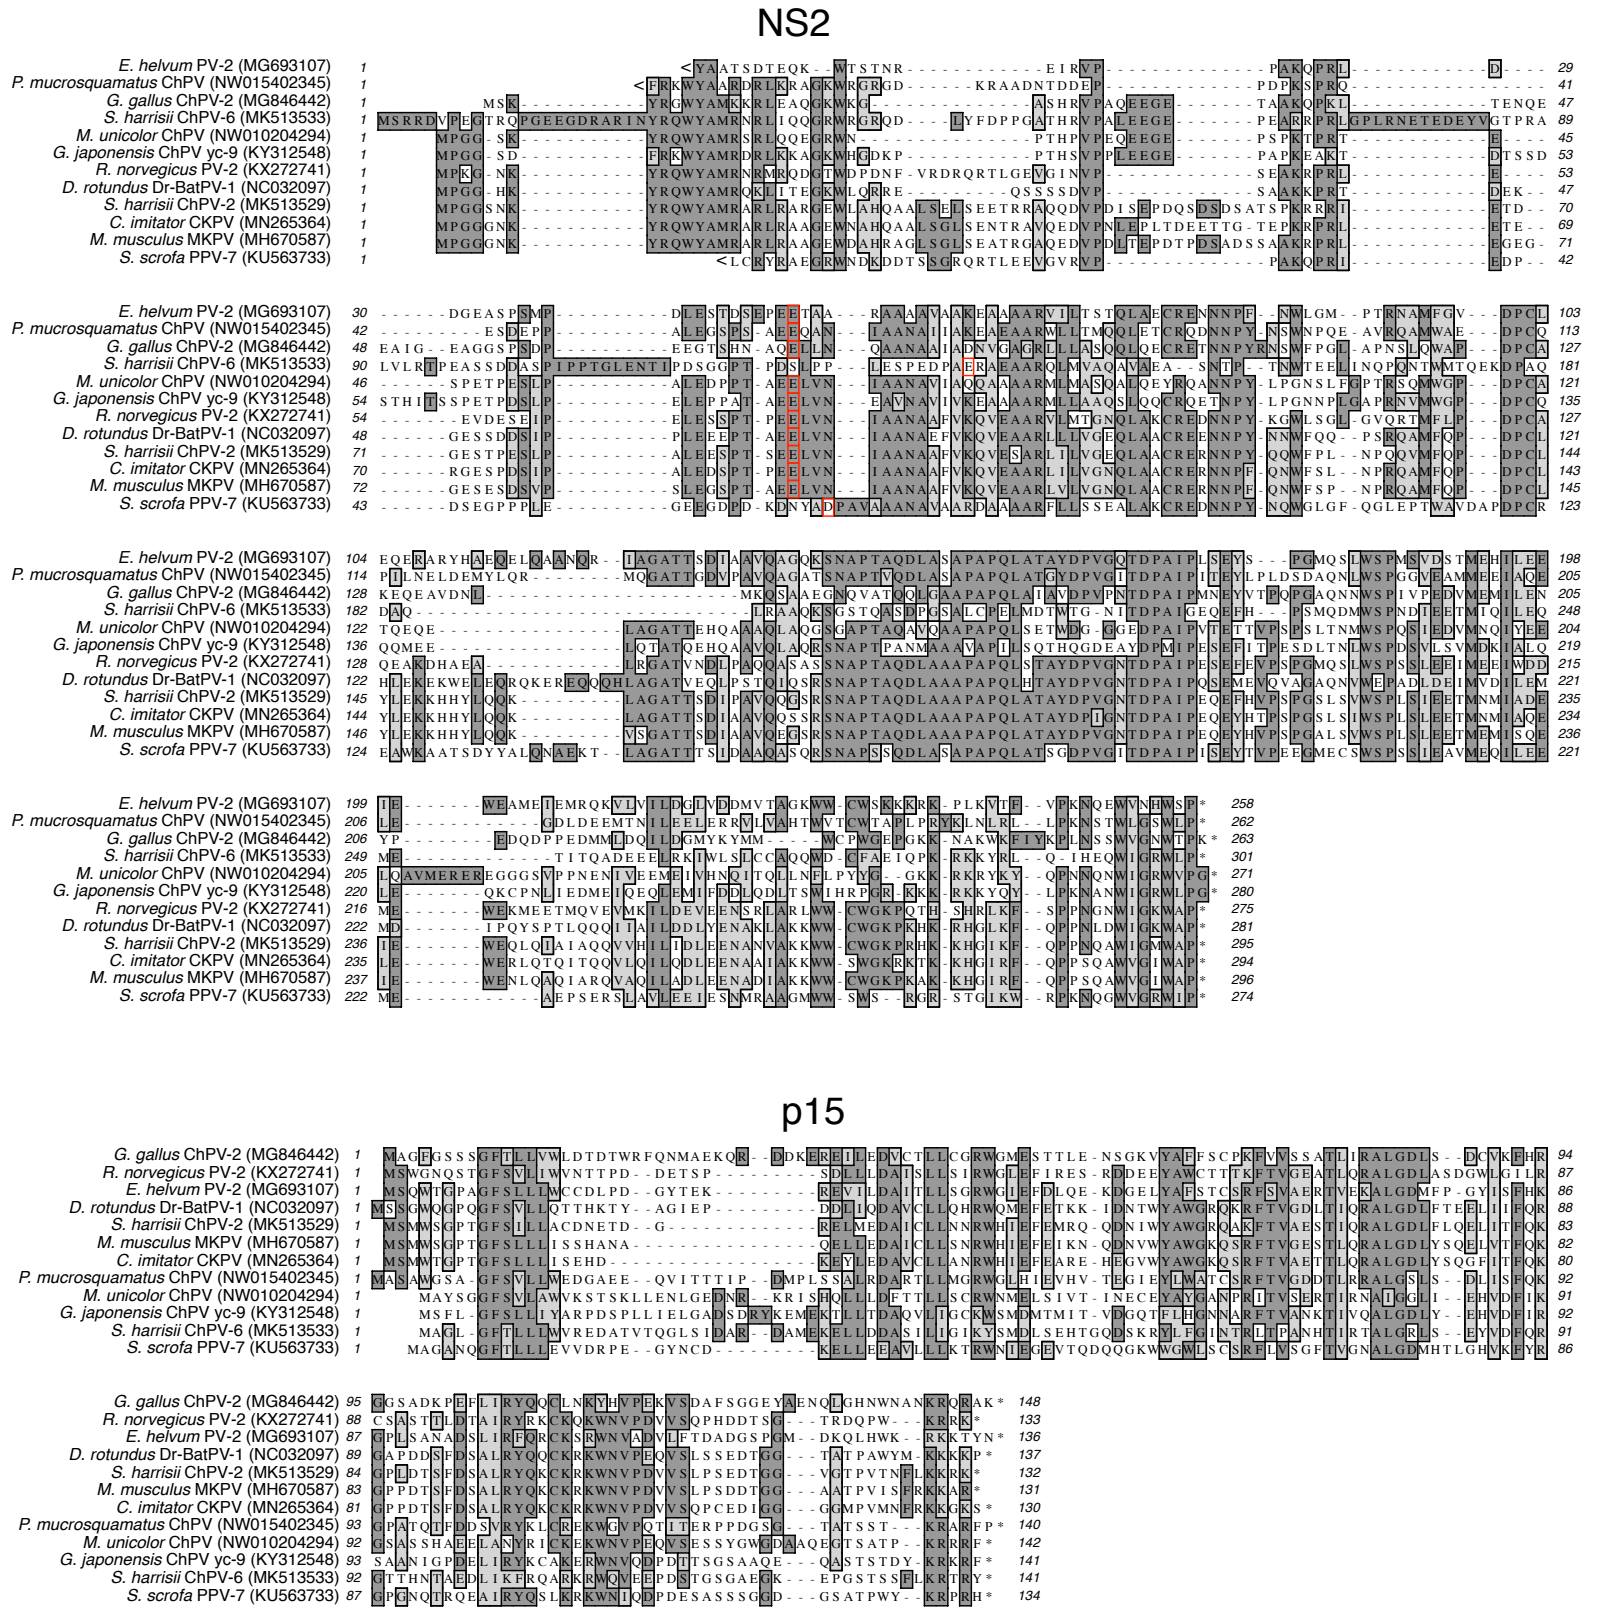

Figure S5A (cont.)

NS1

Table of amino acid sequences for NS1 protein from various species. The table is organized into sections for different species: M. unicolor, R. norvegicus, D. rotundus, C. imitator, M. musculus, S. harrisi, E. helvum, P. microsquamatus, S. scrofa, G. gallus, S. harrisi, and G. japonensis. Each section contains multiple lines of sequence data with corresponding accession numbers and residue positions (e.g., 1-84, 85-178, 185-269, etc.).

Figure S5B

VP

|                                                                                                                                                                                                                                                         |
|---------------------------------------------------------------------------------------------------------------------------------------------------------------------------------------------------------------------------------------------------------|
| <i>Mus musculus</i> MKPV - MH670587<br>Splice score: 0.99<br>TCTCCAAGTCCGAAGGTAATTAAAAACCTTTTTTATATCTTCTTACAGA.....ATGGTTCACCTTATCTATCTTATTTACAGAAACACTATGGCTGAGATGTCA<br>> 2289 bp 80% Pyr < M A E D V                                                 |
| <i>Cebus imitator</i> CKPV - KV391748<br>Splice score: 0.94<br>TCACCAACACCTGAAGTACTTATCTTTTTATTTCTTTTATGCATGCAGAT.....ATGGCTTGCTTATCTCTCTTATTTACAGCAACAATATGGCTGAGATATCA<br>> 2288 bp 87% Pyr < M A E D I                                               |
| <i>Sarcophilus harrisii</i> ChPV 2 - MK513529<br>Splice score: 0.99<br>TCGCCTACATCAGAAGTAATTATATTTACTCTTACTTTTCTTTCTAGATG.....ATGGTATTCTTATCTTTTCTTATTTACAGACTCACTATGGCTGAGATATAT<br>> 2290 bp 80% Pyr < M A E D I                                      |
| <i>Desmodus rotundus</i> parvovirus strain DRA25 - NC_032097<br>Splice score: 1.00<br>GAACCCACAGCAGAAGTAAGCTAACATTTGTATTATTTTTTCATAGATGTC.....ATGGTATATGTATCTCTCCTACCTACAGACAAAATATGGCTGAGATGTCA<br>> 2330 bp 80% Pyr < M A E D V                       |
| <i>Ratus norvegicus</i> parvovirus 2 isolate 9 - KX272741<br>Splice score: 0.89<br>TCTCCTACGCCTGAAGTATTTTATCTTTTTGTTTTTCTCTTTTTAGAAAT.....GCTAATAAATGTAATCTTTGATTTACAGAAATAACATGGCAACTGATGTTT<br>> 2310 bp 67% Pyr < M A T D V                          |
| <i>Eidolon helvum</i> isolate BtPV/CMR/2014 - MG693107<br>Splice score: 0.89<br>GATTCTGAACCTGAAGTATTTTATTTTATTTTATAGATGTCTCAGTGGAC.....CTGGTTATCTTACTTGTCTTATTTACAGACCAATATGGCTGAGATGTTT<br>> 2354 bp 80% Pyr < M A E D V                               |
| <i>Protobothrops mucrosquamatus</i> ChPV NW_015402345<br>Splice score: 0.90<br>AGTCCATCAGCAGAAGTAATGAACCTTTTCTTTTAGCATTTCAGGCTAT.....ATGGAATGTATTGTCTTACTTGCAGAAATAAATATGGCTACTGATCATG<br>> 2285 bp 80% Pyr < M A T D H                                 |
| <i>Sus scrofa</i> PV7 isolate 42 - KU563733<br>Splice score: 0.98<br>AAGACAACCTACGCAGGTGAGTGTGTAAGTCTTT.....CACTGGTGTGCTTATCTGTCTTATCTAGAGCATTGCTTCGGTGATCAATAAGCGCCTGAGCTCAATCATGGCAGAACACATCACC<br>> 2343 bp 73% Pyr < M A E H I T                    |
| <i>Mesitornis unicolor</i> ChPV - NW_010204294<br>Splice score: 0.99<br>CCTCCTACAGCTGAGGTAAGCAATGGCGTATTCTGGCGGTTTTTC.....GCATGTACCTCTTAAATCTGATTGGCAGCAATACCTCAGCTACATCTACCACGCATATGGCTGAGATTATACTA<br>> 2307 bp 60% Pyr < M A E D Y T                 |
| <i>Grus japonicus</i> PV isolate yc-9 - KY312548<br>Splice score: 0.59<br>CCAGCAACAGCTGAAGGTACAACATGCTTTTCTGGGCTTTTCA.....ATTACCTATGATGTTCCCTTTAAACAGGATTGGGAAGAATACCTGAATTTCTGTATCATATGATGGCTGAGACGTCTCATA<br>> 2286 bp 60% Pyr < M A E D V S Y        |
| <i>Gallus gallus</i> PV strain RS/BR/2S - MG846442<br>Splice score: 1.00<br>TCAGATCCTGAAGAAGGTACCAGTCATAATGCACAAGGTATGTCATTATTTTCTTATATTTTCAGAG.....TTTATCTGCATACGAAGATCTACATTCAGATTGAGAAATGACTGAAACAATAAAAT<br>> 2398 bp 53% Pyr < M T E T I K         |
| <i>Sarcophilus harrisii</i> ChPV 6 - MK513533<br>Splice score: 0.99<br>CCTGAGGACCCAGCGGTACGTATGGCAGGTCTAGGC.....CATAACACTATCTATTTCTTACTCCACAGGACTGGAAGAATTACTTGTCTTACTTGTATCACATTTATCACGATGCCGATGACTATACACTAATTGTT<br>> 2186 bp 80% Pyr < M P E Y T N C |

Figure S5B (cont.)

NS2

*Mus musculus* MKPV - MH670587  
Splice score: 0.99 0.58  
TCTCCAAGTCCGAAGGTAATTAACCTTTTTTATATCTTCTTACAGA....ATATGCATGATACACCATTTATTTGCAGAGCTAGTGAATATAGCTGCCAAT  
S P T A E > 1622 bp 67% Pyr <E L V N I A A N

*Cebus imitator* CKPV - KV391748  
Splice score: 0.94 0.95  
TCACCAACACCTGAAGGTACTTATCTTTTATTTCTTTTATGCATGCAGAT....ATATGCACGAAACACCTTTCTTTTGCAGAACTAGTGAACATAGCTGCCAAT  
S P T P E > 1629 bp 73% Pyr <E L V N I A A N

*Sarcophilus harrisii* ChPV 2 - MK513529  
Splice score: 0.99 0.96  
TCGCCTACATCAGAAGTAATTAATTTACTCTTACTTTTCTTTCTAGATG....ATATGCATGATACTCTTTTGTCTTCTAGAGCTAGTGAACATAGCTGCAAAT  
S P T S E > 1623 bp 80% Pyr <E L V N I A A N

*Desmodus rotundus* parvovirus strain DRA25 - NC\_032097  
Splice score: 1.00 0.51  
GAACCCACAGCAGAAGTAAGCTAACATTTGTATTATTTTTCATAGATGTC....ACATGCATAACACCACTTTTCACTTACAGAGTTAGTGAATATAGCTGCGAAT  
E P T A E > 1636 bp 73% Pyr <E L V N I A A N

*Ratus norvegicus* parvovirus 2 isolate 9 - KX272741  
Splice score: 0.89 0.80  
TCTCCTACGCCTGAAGGTATTTATCTTTTTGTTTTCTCTCTTTTAGAAT....ATGATTGCACTGGTCTCTATTCTTGTAGAGCTAGTGAACATAGCTGCGAAT  
S P T P E > 1612 bp 80% Pyr <E L V N I A A N

*Eidolon helvum* isolate BtPV/CMR/2014 - MG693107  
Splice score: 0.89 0.93  
GATTCTGAACCTGAAGGTATTTATTTTATTTTATAGATGTCTCAGTGGAC....ACACTTCCTCTGGTATTTTGTATTTATAGAAACAGCTGCACGAGCTGCAGCT  
D S E P E > 1633 bp 67% Pyr <E T A A R A A A

*Protothrips mucrosquamatus* ChPV NW\_015402345  
Splice score: 0.90 NS  
AGTCCATCAGCAGAAGTAATGAAACCTTTTCTTTTATGATTTTCAGGCTAT....ACATGATGTACCCTGAATTTACACCTAGAACAAGCGAACATAGCTGCGAAT  
S P S A E > 1621 bp 60% Pyr <E Q A N I A A N

*Sus scrofa* PPV7 isolate 42 - KU563733  
Splice score: 0.98 0.93  
AAAGACAACCTACGCAGGTGAGTGTGTAAGTCTTTTGGCTTTTCGCTTTAGAT....ACTGTACTGACGGTGTGTTTCGTTCCAGATCCAGCGGTAGCTGCTGCCAAT  
K D N Y A > 1663 bp 60% Pyr <D P A V A A A N

*Mesitornis unicolor* ChPV - NW\_010204294  
Splice score: 0.99 NS  
CCTCCTACAGCTGAGGTAAGCAATGGCGTATTCTGGCGGTTTTTTCGGTGC....AATGCGCAAACGAACATTATACTCCTAGAGCTCGTGAACATAGCTGCAAAT  
P P T A E > 1637 bp 53% Pyr <E L V N I A A N

*Grus japonicus* PV isolate yc-9 - KY312548  
Splice score: 0.59 0.50  
CCAGCAACAGCTGAAGGTACAACATGTCTTTTCTGGGCTTTTTCATTATTA....CTTCAAAGATGCTGTATATGTTCCAGAAATTAGTGAACGAAGCTGTCAAT  
P A T A E > 1640 bp 60% Pyr <E L V N E A V N

*Gallus gallus* PV strain RS/BR/2S - MG846442  
Splice score: 1.00 0.94  
TCAGATCCTGAAGAAGGTACCAGTCATAATGCACAAGGTATGTCATTATTT....ATATGTCTGATGGTATTTTTCATCCTAGAGTTACTGAATCAGGCTGCGAAT  
S D P E E > 1685 bp 67% Pyr <E L L N Q A A N

*Sarcophilus harrisii* ChPV 6 - MK513533  
Splice score: 0.99 0.49  
CCTGAGGACCCAGCGGTACGTATGGCAGGTCTAGGCTTTACCCTATTGCT....AACCGAGCTGTGAGTGCCTTGCAGAGAGAGCAGAGGCAGCCAGACAA  
P E D P A > 1666 bp 53% Pyr <E R A E A A R Q

Figure S5B (cont.)

NS1 or p15

*Mus musculus* MKPV - MH670587  
Splice score: 0.99 0.98  
CTAGAAGGAGAAGGAGGTGAGTCAGAATCGGA.....ATTAAAAACCTTTTTTATATCTTCTTACAGATGCTCTATGTGGTCA  
> 88/86 bp 87% Pyr <  
p15> M S M W S

*Cebus imitator* CKPV - KV391748  
Splice score: 1.00 0.55  
CTAGAAACCGAAAGAGGTGAGTCGCCAGACTC.....ACTTATCTTTTTATTTCTTTTATGCATGCAGATGCTCTATGTGGACG  
> 84 bp 73% Pyr <  
p15> (+2) <M S M W T

*Sarcophilus harrisii* ChPV 2 - MK513529  
Splice score: 0.99 0.99  
CGTATAGAGACAGACGGTGTGAGTCAACTCCTGA.....TAATTATATTTACTCTTACTTTTCTTTCTAGATGCTCAATGTGGTCT  
> 86 bp 93% Pyr <  
p15> M S M W S

*Desmodus rotundus* parvovirus strain DRA25 - NC\_032097  
Splice score: 0.99 1.00  
CGAACAGACGAAAAGGGTGAGTCTTCAGACGA.....GGTAAGCTAACATTTGTATTATTTTTTCATAGATGCTCTAGCGGCTGG  
> 84 bp 80% Pyr <  
p15> M S S G W

*Ratus norvegicus* parvovirus 2 isolate 9 - KX272741  
Splice score: 0.84 0.99  
GGGACACAGTTTCCTGTGAGGCGTCAGTTGCG.....ATTTATCTTTTTGTTTTTCTCTCTTTTAGAATGCTCTGGGAAAT  
> 262 bp 93% Pyr <  
p15> (+71) <M S W G N

*Eidolon helvum* isolate BtPV/CMR/2014 - MG693107  
Splice score: 0.96 0.99  
CTGCTAAACAACCAAGTTAGACGACGGGAG.....GAACCTGAAGGTATTTATTTTATTTTATAGATGCTCTCAGTGGACG  
> 86 bp 80% Pyr <  
p15> M S Q W T

*Protobothrops mucrosquamatus* ChPV NW\_015402345  
Splice score: 0.95 0.97  
<CTTTCGAAATGTACGCAGCGGTGAT.....AATGAAACCTTTTCTTTTAGCATTTCAGGCTATGGCGTCTGCATGG  
> 188 bp 80% Pyr <  
p15> (+10) <M A S A W

*Sus scrofa* PV7 isolate 42 - KU563733  
Splice score: 0.67 1.00  
GCGGACACTCGAGGAGGTAGGGGTCCGGTCC.....GAGTGTGTAAGTCTTTTGGCTTTTCGCTTTAGATGGCTGGCGCGAATG  
> 145 bp 80% Pyr <  
p15> M A G A N

*Mesitornis unicolor* ChPV - NW\_010204294  
Splice score: 0.95 0.46  
AGTCTGCTTCTATCAGGTAATGCCT.....CCCGCTCTCGAAGATCCTCTACAGCTGAGGGTAAGCAATGGCGTATTCTGGCG  
> 187 bp 67% Pyr <  
p15> M A Y S G

*Grus japonicus* PV isolate yc-9 - KY312548  
Splice score: 0.99 0.96  
TAGATTAAAAAAGCTGTAAGTGGCATGGAGATAAACCTCCAACCTCATTCTGTTCTCCATTAGAAAGAGCGA.....CAACAGCTGAAGGTACAACATGCTCTTTTCTGG  
> 48 bp 80% Pyr <  
p15> M S F L

*Gallus gallus* PV strain RS/BR/2S - MG846442  
Splice score: 0.99 0.96  
CTAGGGTATAAGTATGAGTAAGTACA.....ATGCACAAGGTATGTCATTATTTTCTTATATTTTTCAGAGTATCTATGGCGGGCTTTGGAT  
> 231 bp 80% Pyr <  
p15> M A G F G

*Sarcophilus harrisii* ChPV 6 - MK513533  
Splice score: 0.96 0.40  
CCTGAGGACCCAGCGGTACGAGACAGCC.....GGGACCCCAAGAGCGCTCGTCCCTTAGACCCAGAGGCCT.....CCCAGCGGGTACGTAATGGCAGGTCTAGGCT  
> 253 bp 53% Pyr <  
p15> M A G L G
