# Supplementary material for: Murine and related chapparvoviruses are nephro-tropic and produce novel accessory proteins in infected kidneys
Source: PubMed Central journal article supplement (PMC6999912; doi:10.1371/journal.ppat.1008262), 2020-01-23
Supplement: ppat.1008262.s006.pdf [file ppat.1008262.s006.pdf]

**Table S1A**

PCR primers used in this study

| MKPV primers          | Sequence (5'-3')                              | MKPV bases (MH670587) |
|-----------------------|-----------------------------------------------|-----------------------|
| 869                   | GCAACACAACGTAAATCGG                           | 1458-1477             |
| 870                   | TGGATAATCGTGCCCTAAACC                         | 1534-1553             |
| 889                   | GGGCAGAGAGACTACGTCGGGC                        | 832-853               |
| 890                   | CACGCAGTGCGCGCACATGC                          | 75-94                 |
| 891                   | GGTCAGATACAGAACAGGAGG                         | 3991-4011             |
| 893                   | ACATGTTCTGTACGACTGGG                          | 4372-4391             |
| 900                   | ATTCACTAGCTCTTCGGCAG                          | 478-486:2109-2119     |
| 902                   | TTAGAGAGCAGGCAGATAGC                          | 602-621               |
| 904                   | ATTGAATTCATATGCCGGGCGGAGGTA                   | 214-234               |
| 905                   | TGTGCGGCCGCTTAAGGTGCCAGATCCC                  | 2711-2728             |
| 932                   | AGGCACTACCGCTTTCCTACTG                        | 3061-3080             |
| 933                   | GAAAGCTTTGTAATCTCCTGTG                        | 3163-3184             |
| 934                   | CACCTCACAGAGATCAGATGC                         | 1119-1139             |
| 935                   | TATGCATCTGTGAGGTGGTC                          | 1407-1426             |
| 940                   | AGCCGCATCTATGCACCAAC                          | 3911-3930             |
| 947                   | GACGTGCCAGATCTTACTGAACC                       | 348-370               |
| 948                   | GTGACATCTTCAGCCATAGTG                         | 2779-2799             |
| 955                   | CTGCCAGTTTCGTAGCAGTC                          | 131-150               |
| <b>DrPV-1 primers</b> |                                               |                       |
| Chap-DRPv-fwd         | GCAAGCGCAAGTGGAAACG                           | 654:671               |
| Chap-DRPv-rev         | GACCATCCTCCTCTGTAG                            | 1418:1436             |
| <b>RACE primers</b>   |                                               |                       |
| SMARTer CDS primer    | CGGGGTACGATGAGACACCATTTTTTTTTTTTTTTTTTTTTTTVN |                       |
| Template Switch oligo | AAGCAGTGGTATCAACGCAGAGTACAGGG                 |                       |
| 5' RACE primer        | TTAAGCAGTGGTATCAACGCAGAGTACAG                 |                       |
| 3' RACE primer        | CGGGGTACGATGAGACACCA                          |                       |

**Table S1B**

MKPV PCR product sizes (bp)

| TEMPLATE     | 5' PRIMER | 3' PRIMER |      |      |
|--------------|-----------|-----------|------|------|
|              |           | 902       | 905  | 933  |
| genome       | 890       | 547       | 2654 | 3184 |
| genome       | 955       | 491       | 2598 | 3054 |
| Transcript 1 |           | 491       | 2598 | 3054 |
| Transcript 2 |           | 403       | 2510 | 2966 |
| Transcript 3 |           | -         | 1409 | 1865 |
| Transcript 4 |           | -         | -    | 765  |
| genome       | 904       | 408       | 2515 | 2971 |
| Transcript 1 |           | 408       | 2515 | 2971 |
| Transcript 2 |           | 320       | 2427 | 2883 |
| Transcript 3 |           | -         | 1326 | 1782 |
| Transcript 4 |           | -         | -    | 682  |
| genome       | 947       | 274       | 2381 | 2837 |
| Transcript 1 |           | 274       | 2381 | 2837 |
| Transcript 2 |           | 186       | 2293 | 2749 |
| Transcript 3 |           | -         | 1192 | 1648 |
| Transcript 4 |           | -         | -    | 548  |
