# Supplementary material for: Murine and related chapparvoviruses are nephro-tropic and produce novel accessory proteins in infected kidneys
Source: PubMed Central journal article supplement (PMC6999912; doi:10.1371/journal.ppat.1008262), 2020-01-23
Supplement: ppat.1008262.s007.pdf [file ppat.1008262.s007.pdf]

## Table S2

Summary of significant MKPV peptides in independent LC-MS/MS dataset PXD014938

| Porotein Accession | -10lgP                          | Coverage (%) | Area Sample 1 | #Peptides | #Unique   | #Spec Sample 1 | PTM              | Avg. Mass |   |        |               |          |       |                 |          |                   |       |     |                  |                           |
|--------------------|---------------------------------|--------------|---------------|-----------|-----------|----------------|------------------|-----------|---|--------|---------------|----------|-------|-----------------|----------|-------------------|-------|-----|------------------|---------------------------|
| MKPV_p15           | 145.69                          | 63           | 1.50E+09      | 12        | 12        | 34             |                  | 14683     |   |        |               |          |       |                 |          |                   |       |     |                  |                           |
| MKPV_NS1           | 152.56                          | 28           | 1.91E+08      | 14        | 14        | 22             |                  | 73471     |   |        |               |          |       |                 |          |                   |       |     |                  |                           |
| MKPV_VP1           | 53.89                           | 10           | 1.59E+07      | 4         | 4         | 4              | Deamidation (NQ) | 57170     |   |        |               |          |       |                 |          |                   |       |     |                  |                           |
| MKPV_p10           | 38.41                           | 15           | 2.20E+07      | 2         | 2         | 3              |                  | 9815      |   |        |               |          |       |                 |          |                   |       |     |                  |                           |
| Protein Accession  | Peptide                         | Start-End    | Unique        | -10lgP    | Mass      | Length         | ppm              | m/z       | z | RT     | Area Sample 1 | Fraction | Scan  | Source File     | #Feature | #Feature Sample 1 | Start | End | PTM              | AScore                    |
| MKPV_p15           | R.WHIEFIK.N                     | 36-43        | Y             | 38.56     | 1100.5654 | 8              | 1.4              | 367.8629  | 3 | 74.99  | 2.47E+07      | 1        | 31328 | Infected_01.raw | 1        | 1                 | 36    | 43  |                  |                           |
| MKPV_p15           | K.NQDNVWYAWGK.Q                 | 44-54        | Y             | 48.61     | 1379.6259 | 11             | 0.4              | 690.8205  | 2 | 72.58  | 3.76E+07      | 1        | 29917 | Infected_01.raw | 1        | 1                 | 44    | 54  |                  |                           |
| MKPV_p15           | R.FTVGESTLQR.A                  | 58-67        | Y             | 41.61     | 1136.5825 | 10             | -0.8             | 569.2981  | 2 | 49.57  | 5.95E+08      | 1        | 17244 | Infected_01.raw | 1        | 1                 | 58    | 67  |                  |                           |
| MKPV_p15           | R.ALGDLYSQELVTF.Q               | 68-80        | Y             | 20.05     | 1454.7292 | 13             | -1.1             | 728.3711  | 2 | 96.71  | 1.87E+06      | 1        | 41486 | Infected_01.raw | 1        | 1                 | 68    | 80  |                  |                           |
| MKPV_p15           | R.ALGDLYSQELVTFQK.G             | 68-82        | Y             | 53.78     | 1710.8828 | 15             | 1.6              | 856.4501  | 2 | 80.66  | 2.28E+08      | 1        | 33880 | Infected_01.raw | 3        | 3                 | 68    | 82  |                  |                           |
| MKPV_p15           | K.GPPDTSFDSALR.Y                | 83-94        | Y             | 57.38     | 1261.5939 | 12             | -2.5             | 631.8026  | 2 | 55.06  | 4.86E+08      | 1        | 20336 | Infected_01.raw | 1        | 1                 | 83    | 94  |                  |                           |
| MKPV_p15           | R.KWNVDPVSLPSDDTGGGAATPVISFR    | 101-125      | Y             | 17.64     | 2571.2856 | 25             | 3.4              | 1286.6544 | 2 | 96.06  | 9.41E+05      | 1        | 41124 | Infected_01.raw | 1        | 1                 | 101   | 125 |                  |                           |
| MKPV_p15           | R.KWNVDPVSLPSDDTGGGAATPVISFR.K  | 101-126      | Y             | 42.49     | 2727.3867 | 26             | 0.5              | 910.1366  | 3 | 86.37  | 6.13E+07      | 1        | 36772 | Infected_01.raw | 1        | 1                 | 101   | 126 |                  |                           |
| MKPV_p15           | K.WNVDPVSLPSDDTGGGAATPVISFR.K   | 102-126      | Y             | 35.54     | 2599.2917 | 25             | -1               | 867.437   | 3 | 94.02  | 5.11E+07      | 1        | 40317 | Infected_01.raw | 2        | 2                 | 102   | 126 |                  |                           |
| MKPV_p15           | N.VPDVSLPSDDTGGGAATPVISFR.K     | 104-126      | Y             | 21.74     | 2299.1694 | 23             | -0.6             | 1150.5913 | 2 | 82.81  | 2.41E+06      | 1        | 35047 | Infected_01.raw | 1        | 1                 | 104   | 126 |                  |                           |
| MKPV_p15           | S.LPSDDTGGGAATPVISFR.K          | 110-126      | Y             | 35.6      | 1702.8525 | 17             | -0.9             | 852.4327  | 2 | 67.62  | 7.23E+06      | 1        | 27168 | Infected_01.raw | 1        | 1                 | 110   | 126 |                  |                           |
| MKPV_p15           | S.DDTGGGAATPVISFR.K             | 113-126      | Y             | 41.3      | 1405.6837 | 14             | -1.6             | 703.848   | 2 | 64.49  | 7.43E+06      | 1        | 25529 | Infected_01.raw | 1        | 1                 | 113   | 126 |                  |                           |
| MKPV_NS1           | K.QIQLNWDSR.V                   | 42-50        | Y             | 25.28     | 1161.5601 | 9              | -1.5             | 581.7864  | 2 | 67.44  | 5.21E+06      | 1        | 27089 | Infected_01.raw | 1        | 1                 | 42    | 50  |                  |                           |
| MKPV_NS1           | K.DPHWIAANDMQLTIGFESVYAHDWGQR.F | 158-184      | Y             | 45.71     | 3156.4512 | 27             | 0.2              | 790.1202  | 4 | 100.93 | 4.17E+06      | 1        | 43216 | Infected_01.raw | 2        | 2                 | 158   | 184 |                  |                           |
| MKPV_NS1           | K.HPPEPAIHTLLHQGISPADFPPIFYK.W  | 270-297      | Y             | 46.66     | 3181.6235 | 28             | -0.8             | 796.4125  | 4 | 87.47  | 3.36E+07      | 1        | 37445 | Infected_01.raw | 1        | 1                 | 270   | 297 |                  |                           |
| MKPV_NS1           | H.QGISPADFPPIFYK.W              | 284-297      | Y             | 29.57     | 1596.7823 | 14             | 0.9              | 799.3992  | 2 | 88.01  | 3.13E+06      | 1        | 37637 | Infected_01.raw | 1        | 1                 | 284   | 297 |                  |                           |
| MKPV_NS1           | K.NTLVLWGPSNTGK.S               | 307-319      | Y             | 50.48     | 1385.7303 | 13             | -3.9             | 693.8698  | 2 | 68.87  | 1.10E+07      | 1        | 27859 | Infected_01.raw | 1        | 1                 | 307   | 319 |                  |                           |
| MKPV_NS1           | K.SAFISGLK.T                    | 320-327      | Y             | 30.68     | 821.4647  | 8              | -0.8             | 411.7393  | 2 | 54.48  | 1.43E+07      | 1        | 20107 | Infected_01.raw | 1        | 1                 | 320   | 327 |                  |                           |
| MKPV_NS1           | K.QIFEGMETSIPVK.Y               | 369-381      | Y             | 49.41     | 1477.7487 | 13             | -1.3             | 739.8806  | 2 | 71.09  | 1.24E+07      | 1        | 29127 | Infected_01.raw | 1        | 1                 | 369   | 381 |                  |                           |
| MKPV_NS1           | R.IPIIITNH.A                    | 391-399      | Y             | 30.37     | 1020.5968 | 9              | -0.3             | 511.3055  | 2 | 61.05  | 4.36E+06      | 1        | 23647 | Infected_01.raw | 1        | 1                 | 391   | 399 |                  |                           |
| MKPV_NS1           | R.IPIIITNHAPWR.F                | 391-403      | Y             | 44.49     | 1530.8671 | 13             | 2.3              | 511.2975  | 3 | 69.4   | 1.18E+07      | 1        | 28127 | Infected_01.raw | 2        | 2                 | 391   | 403 |                  |                           |
| MKPV_NS1           | R.KEQSVSELVQPESSSY.V            | 465-481      | Y             | 23.98     | 1892.9003 | 17             | -3.2             | 947.4543  | 2 | 57.69  | 7.75E+06      | 1        | 21777 | Infected_01.raw | 1        | 1                 | 465   | 481 |                  |                           |
| MKPV_NS1           | R.EETPLPAAEGLGSHHQR.H           | 492-508      | Y             | 57.59     | 1827.8864 | 17             | -1.5             | 457.9782  | 4 | 41.7   | 3.21E+07      | 1        | 13023 | Infected_01.raw | 2        | 2                 | 492   | 508 |                  |                           |
| MKPV_NS1           | R.MGEPTSPDSSTGSSDISRPR.G        | 582-601      | Y             | 22.04     | 2062.9226 | 20             | -2.1             | 688.6467  | 3 | 36.37  | 1.09E+06      | 1        | 10183 | Infected_01.raw | 1        | 1                 | 582   | 601 |                  |                           |
| MKPV_NS1           | R.DQVSTAVTGMGR.D                | 623-634      | Y             | 44.84     | 1220.5819 | 12             | 0.6              | 611.2986  | 2 | 46.18  | 2.45E+07      | 1        | 15480 | Infected_01.raw | 1        | 1                 | 623   | 634 |                  |                           |
| MKPV_NS1           | R.DLGLTNIPIR.A                  | 635-644      | Y             | 31.61     | 1098.6033 | 10             | -0.6             | 550.3086  | 2 | 62.65  | 2.52E+07      | 1        | 24473 | Infected_01.raw | 1        | 1                 | 635   | 644 |                  |                           |
| MKPV_VP1           | K.NDYTIPLLDMPIVPMQWFWQEIQK.S    | 287-311      | Y             | 22.49     | 3118.5295 | 25             | -1.2             | 1040.5159 | 3 | 134.06 | 3.74E+05      | 1        | 56548 | Infected_01.raw | 1        | 1                 | 287   | 311 |                  |                           |
| MKPV_VP1           | K.SIAEVPDVK.K                   | 312-320      | Y             | 35.45     | 956.5178  | 9              | -0.9             | 479.2657  | 2 | 47.33  | 7.63E+06      | 1        | 16005 | Infected_01.raw | 1        | 1                 | 312   | 320 |                  |                           |
| MKPV_VP1           | K.ATMHPYEQAASGM.Y.L             | 456-469      | Y             | 15.06     | 1555.6436 | 14             | -2.9             | 778.8268  | 2 | 53.71  | 3.53E+06      | 1        | 19606 | Infected_01.raw | 1        | 1                 | 456   | 469 |                  |                           |
| MKPV_VP1           | K.ATMHPYEQAASGM.YLN(+98)HK.E    | 456-473      | Y             | 21.55     | 2048.9084 | 18             | -2.8             | 683.9749  | 3 | 50.6   | 4.34E+06      | 1        | 17899 | Infected_01.raw | 1        | 1                 | 456   | 473 | Deamidation (NQ) | N16:Deamidation (NQ):8.51 |
| MKPV_p10           | R.LTLQIHLQSDR.V                 | 77-88        | Y             | 25.52     | 1450.7892 | 12             | -0.4             | 484.6035  | 3 | 55.37  | 6.09E+06      | 1        | 20525 | Infected_01.raw | 1        | 1                 | 77    | 88  |                  |                           |
| MKPV_p10           | R.LTLQIHLQSDRV                  | 77-89        | Y             | 24.92     | 1549.8577 | 13             | -0.3             | 517.6263  | 3 | 61.41  | 1.59E+07      | 1        | 23827 | Infected_01.raw | 2        | 2                 | 77    | 89  |                  |                           |
