# Supplementary material for: Murine and related chapparvoviruses are nephro-tropic and produce novel accessory proteins in infected kidneys
Source: PubMed Central journal article supplement (PMC6999912; doi:10.1371/journal.ppat.1008262), 2020-01-23
Supplement: ppat.1008262.s008.pdf [file ppat.1008262.s008.pdf]

## Table S3

### Summary of significant MKPV peptides in independent LC-MS/MS dataset PXD010540

| <b>MKPV p15; 130 residues</b> |        |           |        |               |               |                  |       |                   |  |  |
|-------------------------------|--------|-----------|--------|---------------|---------------|------------------|-------|-------------------|--|--|
| Sequence                      | Unique | Start-End | -10lgP | Mass expected | Mass observed | Mass Error (ppm) | Score | Expectation Value |  |  |
| K.NQDNVWYAWGK.Q               | Y      | 44-54     | 3.74   | 1379.6280     | 1379.6258     | 1.59             | 37    | 1.800E-04         |  |  |
| R.FTVGESTLQR.A                | Y      | 58-67     | 5.66   | 1136.5816     | 1136.5826     | -0.88            | 57    | 2.200E-06         |  |  |
| R.ALGDLYSQELVTFQK.G           | Y      | 68-82     | 4.11   | 1710.8825     | 1710.8828     | -0.18            | 41    | 7.800E-05         |  |  |
| K.GPPDTSFDSALR.Y              | Y      | 83-94     | 8.07   | 1261.5964     | 1261.5939     | 1.98             | 81    | 8.600E-09         |  |  |
| K.WNVDPVVSLPDDTGGAATPVISFR.K  | Y      | 102-126   | 5.00   | 2599.2940     | 2599.2919     | 0.81             | 50    | 1.000E-05         |  |  |
| <b>MKPV NS1; 659 residues</b> |        |           |        |               |               |                  |       |                   |  |  |
| K.NTLVLWGPSNTGK.S             | Y      | 307-319   | 2.85   | 1385.7315     | 1385.7303     | 0.87             | 28    | 1.400E-03         |  |  |
| R.KEQSVSELVQPEPSSSYVSTR.S     | Y      | 465-485   | 3.96   | 2336.1511     | 2336.1496     | 0.64             | 40    | 1.100E-04         |  |  |
| R.EETPLPAAEGLGSHHQR.H         | Y      | 492-508   | 4.82   | 1827.8895     | 1827.8864     | 1.70             | 48    | 1.500E-05         |  |  |
| R.DQVSTAVTGMGR.D              | Y      | 623-634   | 5.28   | 1220.5815     | 1220.5820     | -0.41            | 53    | 5.200E-06         |  |  |
| R.DLGTLNIPTR.A                | Y      | 635-644   | 4.82   | 1098.6006     | 1098.6033     | -2.46            | 48    | 1.500E-05         |  |  |
| <b>MKPV VP; 496 residues</b>  |        |           |        |               |               |                  |       |                   |  |  |
| K.ATMHPYEQAASGMYLNHK.E        | Y      | 456-473   | 2.49   | 2047.9182     | 2047.9244     | -3.03            | 25    | 3.200E-03         |  |  |
| <b>MKPV p10; 89 residues</b>  |        |           |        |               |               |                  |       |                   |  |  |
| R.LTLQIHQLQSDRV               | Y      | 77-89     | 7.89   | 1549.8595     | 1549.8574     | 1.35             | 79    | 1.300E-08         |  |  |
