# Supplementary material for: Murine and related chapparvoviruses are nephro-tropic and produce novel accessory proteins in infected kidneys
Source: PubMed Central journal article supplement (PMC6999912; doi:10.1371/journal.ppat.1008262), 2020-01-23
Supplement: ppat.1008262.s009.pdf [file ppat.1008262.s009.pdf]

**Table S4** Summary of MKPV splicing in dataset GSE117710

| donor:acceptor nt | splice donor* | splice acceptor*      | Read Counts |         | Read Proportion |         | notes                                |
|-------------------|---------------|-----------------------|-------------|---------|-----------------|---------|--------------------------------------|
|                   |               |                       | Mouse 1     | Mouse 2 | Mouse 1         | Mouse 2 |                                      |
| 487:2775          | GCCGAAGGTAATT | TATCTATCTTATTTACAGAAA | 5038        | 296     | 3.8E-01         | 4.9E-01 | VP, p10 CDS                          |
| 487:2108          | GCCGAAGGTAATT | TACACCATTTATTTGCAGAGC | 2962        | 110     | 2.2E-01         | 1.8E-01 | NS2, p10 CDS                         |
| 433:520           | AAGGAGGTGAGT  | TTTTATATCTTCTTACAGATG | 2589        | 52      | 1.9E-01         | 8.7E-02 | p15, NS1, NP ± p10 CDS               |
| retain 487-520    | n/a           | n/a                   | 1835        | 43      | 1.4E-01         | 7.2E-02 | p15, NS1, NP, p10 CDS                |
| 433:2775          | AAGGAGGTGAGT  | TATCTATCTTATTTACAGAAA | 347         | 43      | 2.6E-02         | 7.2E-02 | VP, p10 CDS                          |
| 232:390           | GCCGAGGTAATA  | ATACGCCTGACTCTGCAGATT | 243         | 5       | 5.0E-03         | 8.4E-03 |                                      |
| 2588:2775         | CGACAGGTAGCT  | TATCTATCTTATTTACAGAAA | 143         | 35      | 1.1E-02         | 5.9E-02 | alters C-terminus of NS1, NS2 or NP? |
| 283:390           | CAGCAGGCGAGT  | ATACGCCTGACTCTGCAGATT | 77          | 0       | 5.7E-03         | 0       |                                      |
| 667:2775          | TGTCTGGTATGC  | TATCTATCTTATTTACAGAAA | 69          | 8       | 5.1E-03         | 1.3E-02 | VP1, p10 CDS                         |
| 433:2108          | AAGGAGGTGAGT  | TACACCATTTATTTGCAGAGC | 67          | 5       | 1.8E-02         | 8.4E-03 | removes 18 aa from exon 1 of NS2     |
| 2189:2775         | CAGCTGGCAGCT  | TATCTATCTTATTTACAGAAA | 19          | 0       | 1.4E-03         | 0       |                                      |
| 433:745           | AAGGAGGTGAGT  | GGTGATCTCTATTCACAGGAG | 13          | 0       | 9.7E-04         | 0       |                                      |
| others            | n/a           | n/a                   | <5          | <5      | 7.5E-05         | 1.7E-03 |                                      |

\* exon = black, intron = red; n/a = not applicable
