# Supplementary material for: Murine and related chapparvoviruses are nephro-tropic and produce novel accessory proteins in infected kidneys
Source: PubMed Central journal article supplement (PMC6999912; doi:10.1371/journal.ppat.1008262), 2020-01-23
Supplement: ppat.1008262.s010.pdf [file ppat.1008262.s010.pdf]

## Table S5

Summary of ISH in multiple tissues.

| Animal description (1)                          |                                                                           |                                           |              |                                                                           |                |          |
|-------------------------------------------------|---------------------------------------------------------------------------|-------------------------------------------|--------------|---------------------------------------------------------------------------|----------------|----------|
| MSKCC-WCM Accession #                           | 16-1653-1                                                                 | 15-3577-1                                 |              |                                                                           |                |          |
| Sex                                             | Female                                                                    | Female                                    |              |                                                                           |                |          |
| Age                                             | Unknown (adult)                                                           | 12 months                                 |              |                                                                           |                |          |
| Strain                                          | NSG                                                                       | NSG                                       |              |                                                                           |                |          |
| Cause of death                                  | Inclusion body nephropathy caused by MKPV                                 | Inclusion body nephropathy caused by MKPV |              |                                                                           |                |          |
| Previously reported MKPV testing (1)            |                                                                           |                                           |              |                                                                           |                |          |
| MKPV PCR on FFPE kidney tissue                  | Positive                                                                  | Positive                                  |              |                                                                           |                |          |
| MKPV ISH on FFPE kidney tissue                  | Strongly positive, tubular cells, multifocal                              | NP                                        |              |                                                                           |                |          |
| ISH results                                     | MKPV ISH                                                                  | Mouse Ppib ISH (2)                        | Dapb ISH (3) | MKPV ISH                                                                  | Mouse Ppib ISH | Dapb ISH |
| Heart                                           | Negative                                                                  | NP                                        | NP           | Negative                                                                  | Positive       | NP       |
| Lungs                                           | Negative                                                                  | NP                                        | NP           | Negative                                                                  | Positive       | NP       |
| Thymus                                          | U                                                                         | NP                                        | NP           | Negative                                                                  | Positive       | NP       |
| Kidneys                                         | U (4)                                                                     | NP                                        | NP           | Strongly positive, tubular cells, multifocal                              | NP             | NP       |
| Liver                                           | Negative                                                                  | NP                                        | NP           | Negative                                                                  | NP             | NP       |
| Gallbladder                                     | Negative                                                                  | NP                                        | NP           | Negative                                                                  | NP             | NP       |
| Stomach                                         | Negative                                                                  | NP                                        | NP           | Negative                                                                  | NP             | NP       |
| Duodenum                                        | Negative                                                                  | NP                                        | NP           | Negative                                                                  | NP             | NP       |
| Jejunum                                         | Negative                                                                  | NP                                        | NP           | Negative                                                                  | NP             | NP       |
| Ileum                                           | Negative                                                                  | NP                                        | NP           | Negative                                                                  | NP             | NP       |
| Cecum                                           | Mildly positive, mucosal epithelium and lamina propria, multifocal        | NP                                        | NP           | Negative                                                                  | NP             | NP       |
| Colon                                           | Negative                                                                  | NP                                        | NP           | U                                                                         | NP             | NP       |
| Salivary glands                                 | Negative                                                                  | NP                                        | NP           | Negative                                                                  | NP             | NP       |
| Uterus                                          | Negative                                                                  | Positive                                  | NP           | Negative                                                                  | NP             | NP       |
| Urinary bladder                                 | Mildly positive, urothelium multifocal; Strongly positive, casts in lumen | Positive                                  | NP           | Mildly positive, urothelium multifocal; Strongly positive, casts in lumen | NP             | NP       |
| Pancreas                                        | Negative                                                                  | NP                                        | NP           | Negative                                                                  | NP             | NP       |
| Adrenals                                        | Negative                                                                  | Positive                                  | Negative     | U                                                                         | NP             | NP       |
| Ovaries                                         | Negative                                                                  | Positive                                  | Negative     | Negative                                                                  | NP             | NP       |
| Oviducts                                        | Negative                                                                  | Positive                                  | Negative     | Negative                                                                  | NP             | NP       |
| Trachea                                         | Negative                                                                  | Positive                                  | Negative     | Negative                                                                  | Positive       | NP       |
| Esophagus                                       | Negative                                                                  | Positive                                  | Negative     | Negative                                                                  | Positive       | NP       |
| Thyroid                                         | Negative                                                                  | Positive                                  | Negative     | Negative                                                                  | NP             | NP       |
| Skin (trunk)                                    | Negative                                                                  | Positive                                  | Negative     | U                                                                         | NP             | NP       |
| Skeletal muscles                                | Negative                                                                  | NP                                        | NP           | Negative                                                                  | NP             | NP       |
| Bones (femur, tibia, sternum, vertebrae, skull) | Not interpreted (5)                                                       | NP                                        | NP           | Not interpreted (5)                                                       | NP             | NP       |
| Bone marrow (femur, tibia, sternum, vertebrae)  | Not interpreted (5)                                                       | NP                                        | NP           | Not interpreted (5)                                                       | NP             | NP       |
| Stifle joint                                    | Not interpreted (5)                                                       | NP                                        | NP           | Not interpreted (5)                                                       | NP             | NP       |
| Nerves (hind limb, spine)                       | Not interpreted (5)                                                       | NP                                        | NP           | Not interpreted (5)                                                       | NP             | NP       |
| Spinal cord                                     | Not interpreted (5)                                                       | NP                                        | NP           | Not interpreted (5)                                                       | NP             | NP       |
| Oral mucosa                                     | Not interpreted (5)                                                       | NP                                        | NP           | Not interpreted (5)                                                       | Negative (5)   | Negative |
| Teeth                                           | Not interpreted (5)                                                       | NP                                        | NP           | Not interpreted (5)                                                       | Negative (5)   | Negative |
| Nasal mucosa                                    | Not interpreted (5)                                                       | NP                                        | NP           | Not interpreted (5)                                                       | Negative (5)   | Negative |
| Eyes                                            | Not interpreted (5)                                                       | NP                                        | NP           | Not interpreted (5)                                                       | Negative (5)   | Negative |
| Harderian gland                                 | Not interpreted (5)                                                       | NP                                        | NP           | Not interpreted (5)                                                       | Negative (5)   | Negative |
| Pituitary                                       | Not interpreted (5)                                                       | Negative (5)                              | Negative     | Not interpreted (5)                                                       | NP             | NP       |
| Brain                                           | Not interpreted (5)                                                       | Negative (5)                              | Negative     | Not interpreted (5)                                                       | Negative (5)   | Negative |
| Ears                                            | Not interpreted (5)                                                       | Negative (5)                              | Negative     | Not interpreted (5)                                                       | NP             | NP       |

### Notes:

- As described in reference 9.
- Positive control probe.
- Negative control probe.
- Tissue exhausted by previous ISH staining; kidney sample from this mouse was previously found to be ISH positive as described in reference 9.
- Due to inadequate RNA preservation caused by formic acid decalcification, as shown by negative Ppib results on all decalcified tissues tested.

NSG, NOD.Cg-Prkdc<sup>scid</sup> Il2rg<sup>tm1Wjl</sup>/Sz; FFPE, formalin-fixed paraffin-embedded; NP, not performed; U, sample unavailable.
